# Supplementary material for: Small Molecule Inhibitors of PFKFB3 as Therapeutic Targets for Atherosclerosis
Source: Research Square preprint supplement (doi:10.21203/rs.3.rs-5378380/v1), 2024-11-27
Supplement: Supplementary file 1 [file 7551d86ee712fbb79b3667c6.docx]

ADDITION:

DATA AVAILABILITY DISCLAIMER: Raw data supporting the conclusions of this article will be provided by the authors without reservation.

Author contributions:Lan Yu, designed and planned the experiments. Lan Yu, Wang Runqing performed the experiments. All authors reviewed and approved the manuscript.

Funding: The research fund was provided by Gansu Provincial Health Research Program and Lan Yu personally.

Acknowledgments: we thank Lanzhou University Cardiovascular Laboratory for the experimental equipment.

Conflict of interest:The authors declare no conflict of interest.
